# Supplementary material for: Opposing effects of viral mediated brain expression of apolipoprotein E2 (apoE2) and apoE4 on apoE lipidation and Aβ metabolism in apoE4-targeted replacement mice
Source: Springer Nature journal article supplement (doi:10.1186/s13024-015-0001-3), 2015-03-04
Supplement: MOESM1 [file 9776402]

## Additional figures

A

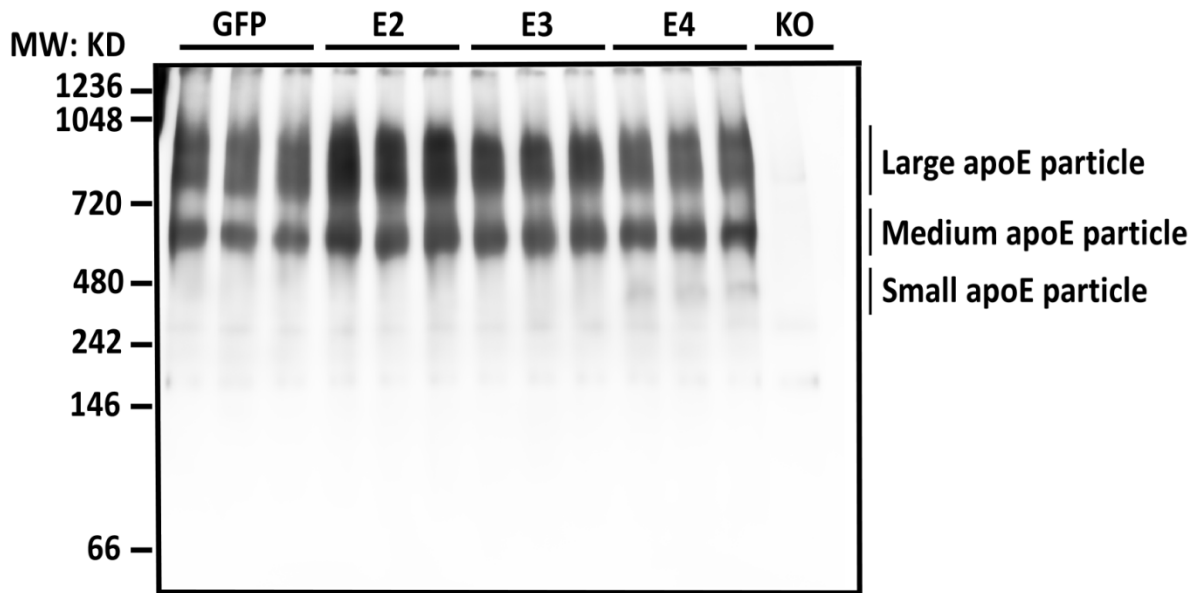

B

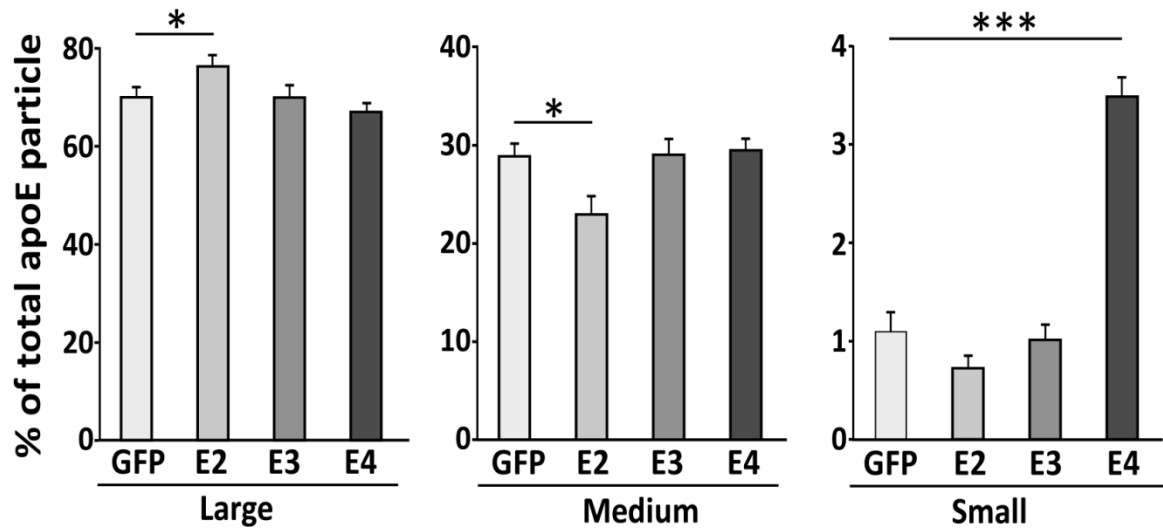

**Figure S1. Analysis of apoE-associated lipoprotein particles in apoE3-TR mice transduced with viruses carrying AAV8-GFAP-apoE isoforms**

Neonatal P2 apoE3-TR mice were injected with AAV viruses and brains were harvested as in Figure 2. (A) ApoE-associated particles in the TBS fractions of cortical brain tissues were analyzed by native gel electrophoresis. ApoE lipoprotein particles were defined as three categories of particle sizes: Large particles (>720 kDa); Medium particles (480-720 kDa) and Small particles (<480 kDa). Cortical lysates from age-matched *ApoE* knockout mice was used as a negative control for apoE immunoreactivity. (B) The percentages of apoE particles in different size categories were quantified. Data are expressed as mean  $\pm$  SEM (n=3-5). \*,  $p < 0.05$ ; \*\*,  $p < 0.01$ ; \*\*\*,  $p < 0.001$ .

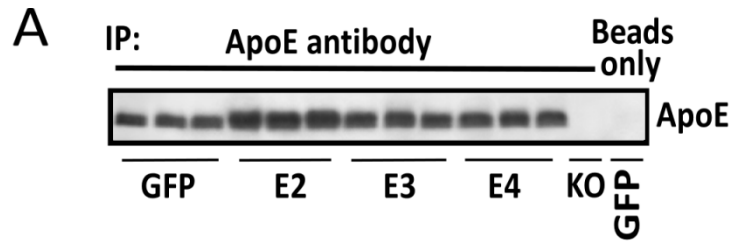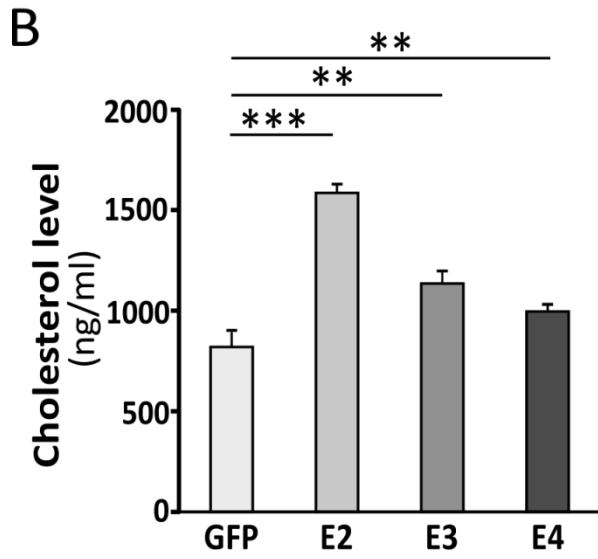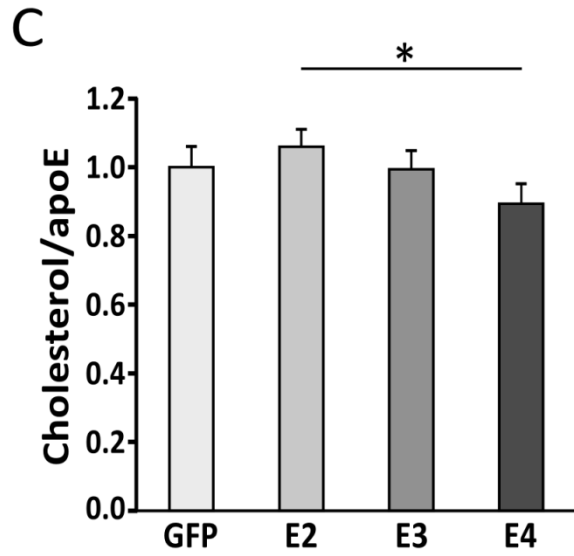

**Figure S2. ApoE-associated cholesterol levels in apoE3-TR mice transduced with viruses carrying AAV8-GFAP-apoE isoforms**

Neonatal P2 apoE3-TR mice were injected with AAV viruses and brains were harvested as in Figure 2. Mouse cortical brain tissues were lysed in TBS and the apoE-associated particles were isolated by immunoprecipitation using a biotinylated-apoE specific antibody. Mice injected with GFP viruses treated with beads only were used as a negative control. (A) The immunoprecipitated apoE under different conditions was detected by Western blot. (B) ApoE-associated cholesterol was analyzed by Amplex Red Cholesterol Assay. (C) The ratios of cholesterol to apoE under each condition were calculated. Data are expressed as mean  $\pm$  SEM (n=3-5/group). \*, p < 0.05; \*\*, p < 0.01; \*\*\*, p < 0.001.

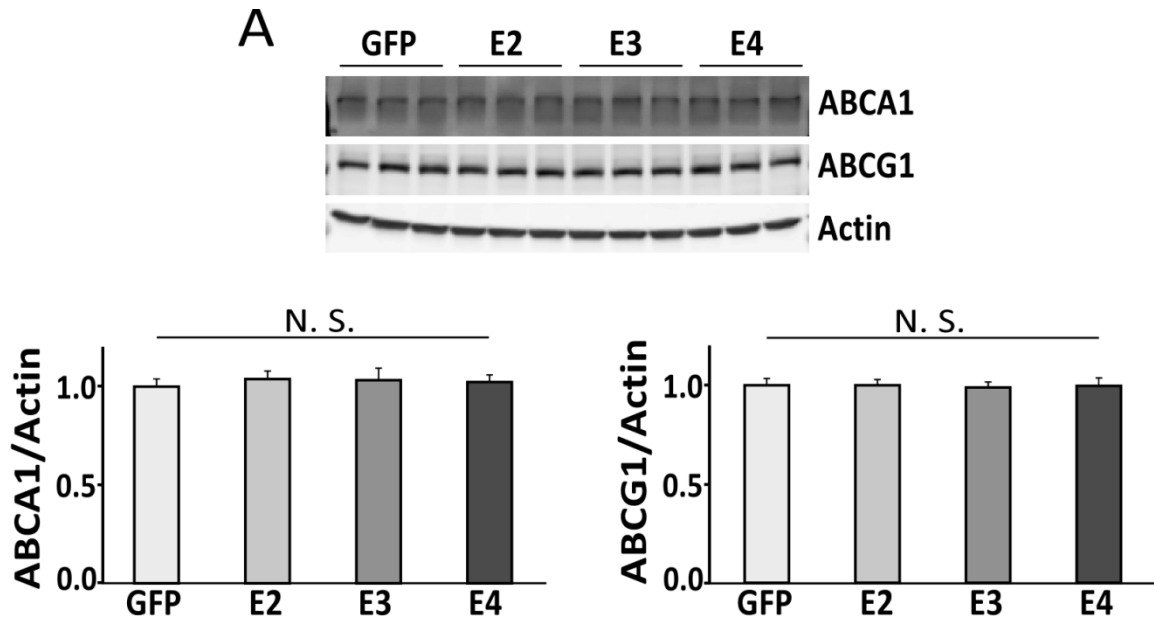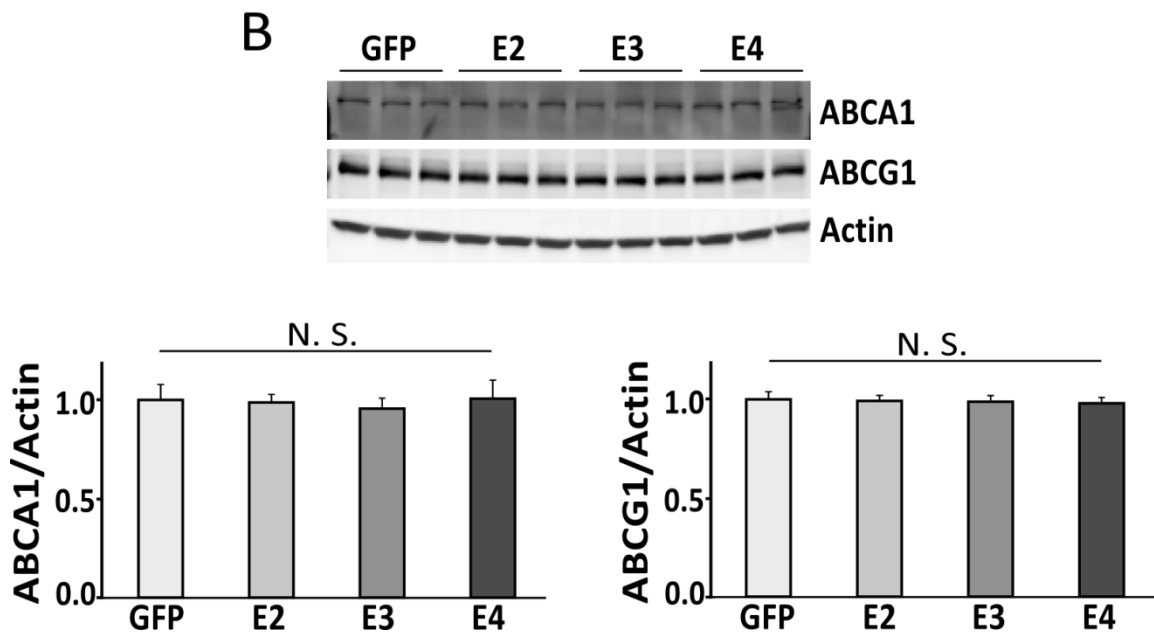

**Figure S3. Overexpression of apoE isoforms does not affect the levels of ABCA1 and ABCG1 in apoE-TR mice**

Neonatal P2 apoE3-TR or apoE4-TR mice were injected with AAV viruses and brains were harvested as in Figure 2. Mouse brain cortical tissues were lysed in TBSX and 30  $\mu$ g of protein lysates were loaded for Western blot. The levels of ABCA1, ABCG1 and actin from the brains of apoE3-TR mice (A) and apoE4-TR mice (B) were detected and quantified. Data are expressed as mean  $\pm$  SEM (n=3-5). N.S., not significant.

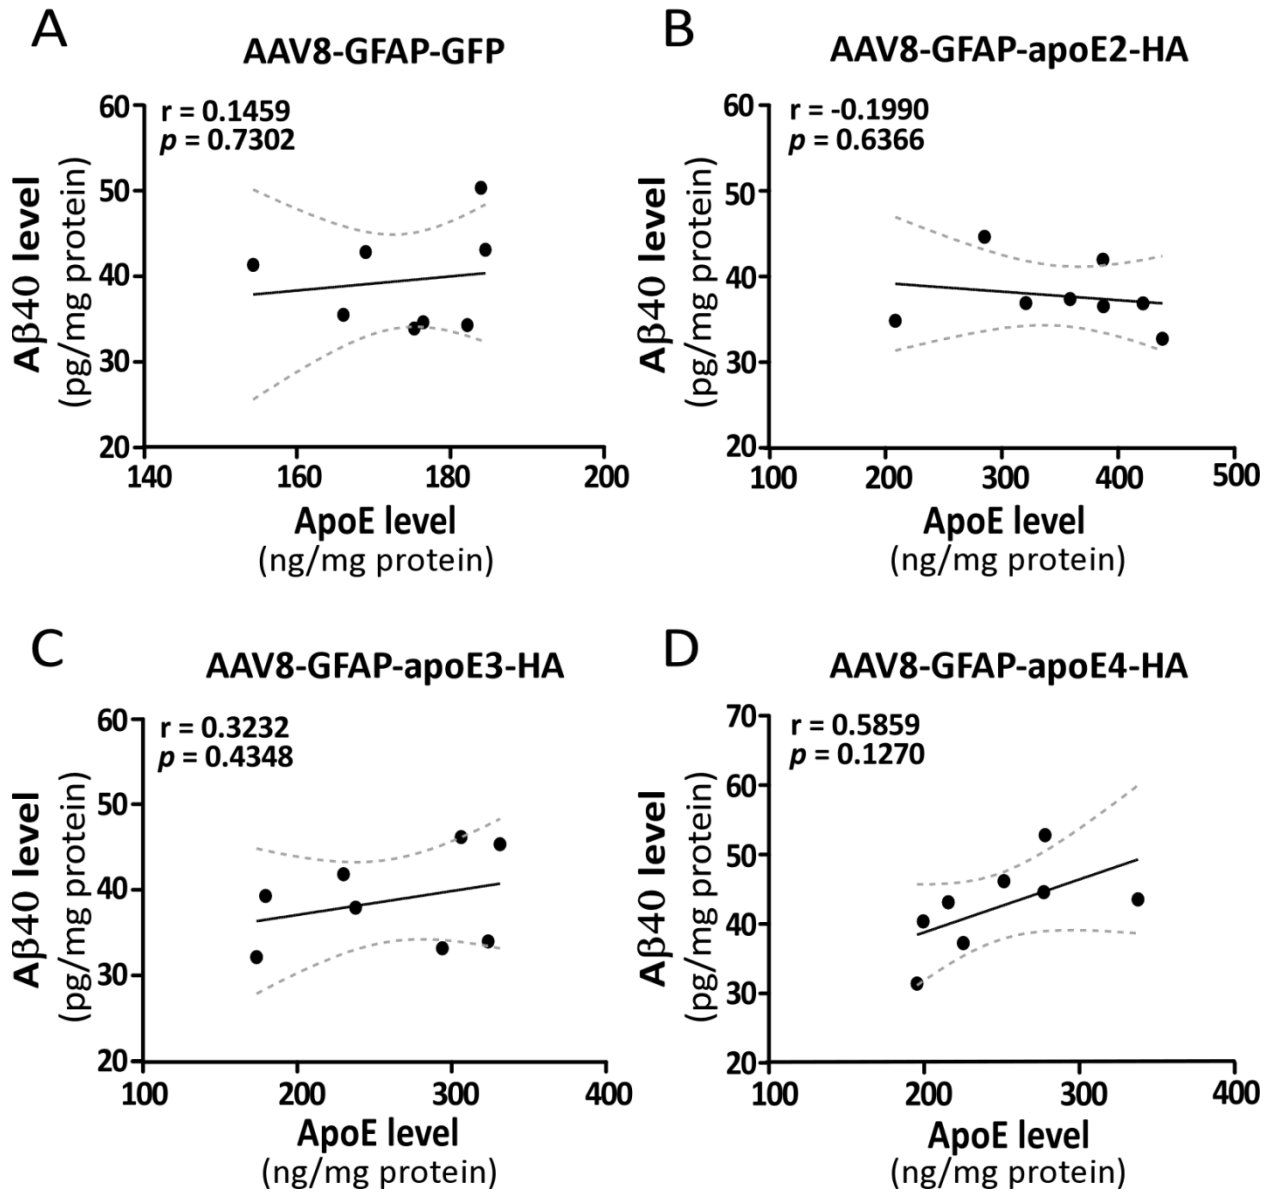

**Figure S4. Correlation analysis between mouse endogenous A $\beta$  and apoE in apoE3-TR mice transduced with viruses carrying AAV8-GFAP-apoE isoforms**

Three months after intracranial delivery of viruses carrying AAV8-GFAP-GFP or AAV8-GFAP-apoE isoforms, the levels of mouse endogenous A $\beta$ 40 and apoE in the cortices of apoE3-TR mice were examined by A $\beta$ 40-specific ELISA and apoE-specific ELISA, respectively. (A-D) The correlation between levels of A $\beta$ 40 and apoE in the cortex of apoE4-TR mice transduced with GFP (A), apoE2 (B), apoE3 (C) or apoE4 (D) were analyzed and plotted. The Pearson correlation coefficient (r) and p values are shown.



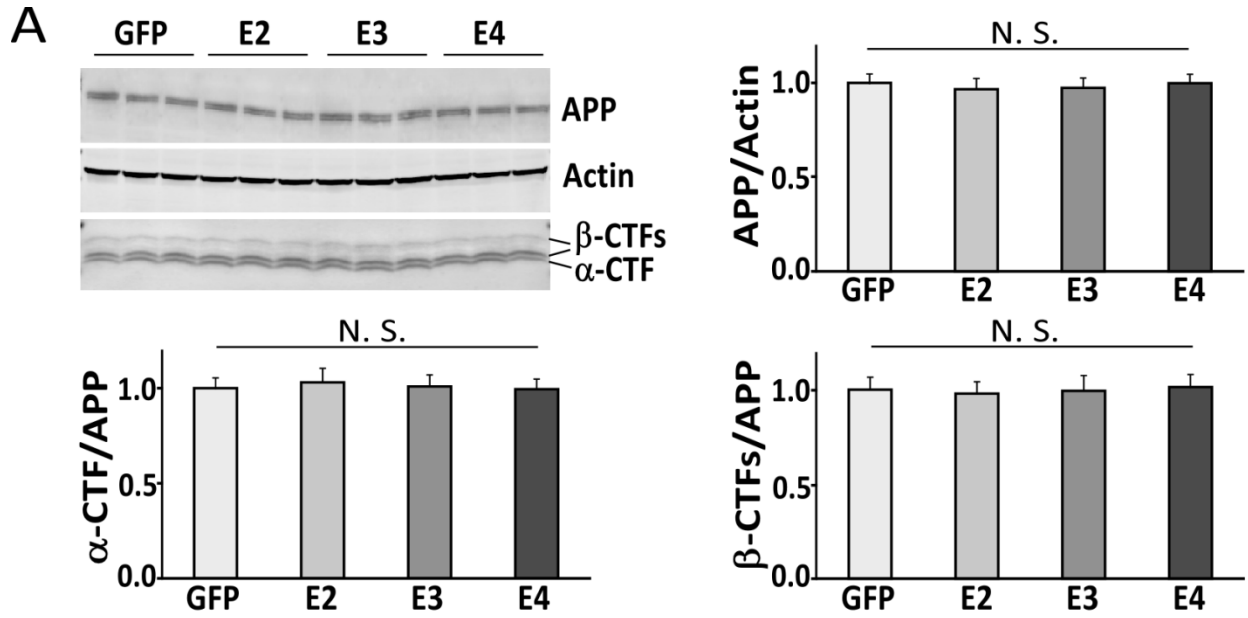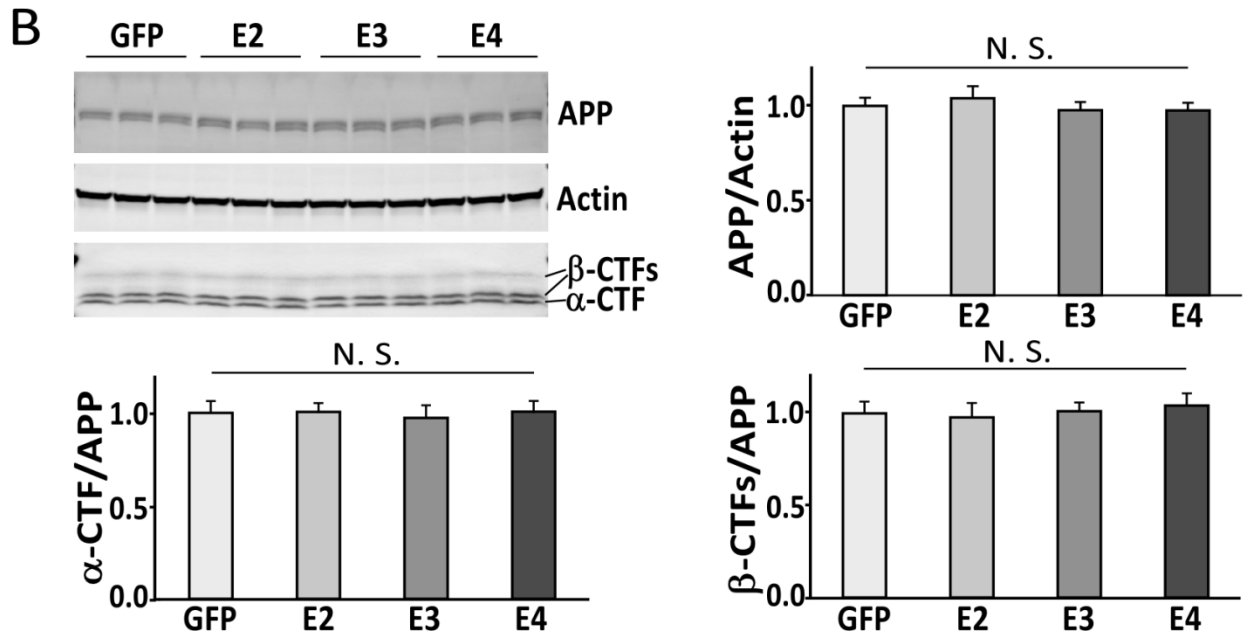

**Figure S5. APP expression and processing are not altered in apoE-TR mice upon overexpression of apoE isoforms**

Neonatal P2 apoE3-TR or apoE4-TR mice were injected with AAV viruses and brains were harvested as in Figure 2. Mouse brain cortical tissues were lysed in TBS containing 1% Triton X-100 (TBSX) and 30  $\mu$ g of protein lysates were loaded for Western blott. The levels of APP and its C-terminal fragments, as well as  $\beta$ -actin from brains of apoE3-TR mice (A) and apoE4 TR mice (B) were detected and quantified. Data are expressed as mean  $\pm$  SEM (n=3-5). N.S., not significant.
